# Supplementary material
Source: PubMed Central journal article supplement (PMC6863082)
Supplement: NIHMS1057894-supplement-Supporting_information_Figure_S1.pdf [file NIHMS1057894-supplement-Supporting_information_Figure_S1.pdf]

## Supporting Information

### Molecular mechanism of inhibition of acid ceramidase by carmofur

Alexey Dementiev<sup>1</sup>, Andrzej Joachimiak<sup>1</sup>, Ha Nguyen<sup>2</sup>, Alexei Gorelik<sup>3</sup>, Katalin Illes<sup>3</sup>, Saman Shabani<sup>4</sup>, Michael Gelsomino<sup>4</sup>, Eun-Young Erin Ahn<sup>5</sup>, Bhushan Nagar<sup>3</sup>, Ninh Doan<sup>5\*</sup>

<sup>1</sup> Structural Biology Center, Biosciences Division, Argonne National Laboratory, Lemont, IL 60439 USA

<sup>2</sup> California Institute of Neuroscience, Thousand Oaks, California, USA; National Skull Base Center, Thousand Oaks, CA 91360 USA

<sup>3</sup> Department of Biochemistry and Groupe de Recherche Axé sur la Structure des Protéines, McGill University, Montreal, QC H3G 0B1 Canada

<sup>4</sup> Department of Neurosurgery, Medical College of Wisconsin, Milwaukee, 53226 WI

<sup>5</sup> Department of Neurosurgery, Mitchell Cancer Institute, University of South Alabama, Mobile, 36617 USA.

\*Corresponding author: Ninh Doan, MD, PhD, e-mail address: [ndoan@health.southalabama.edu](mailto:ndoan@health.southalabama.edu)

Contents:

**Figure S1.** Chemical structure of carmofur and its mechanism of inhibition

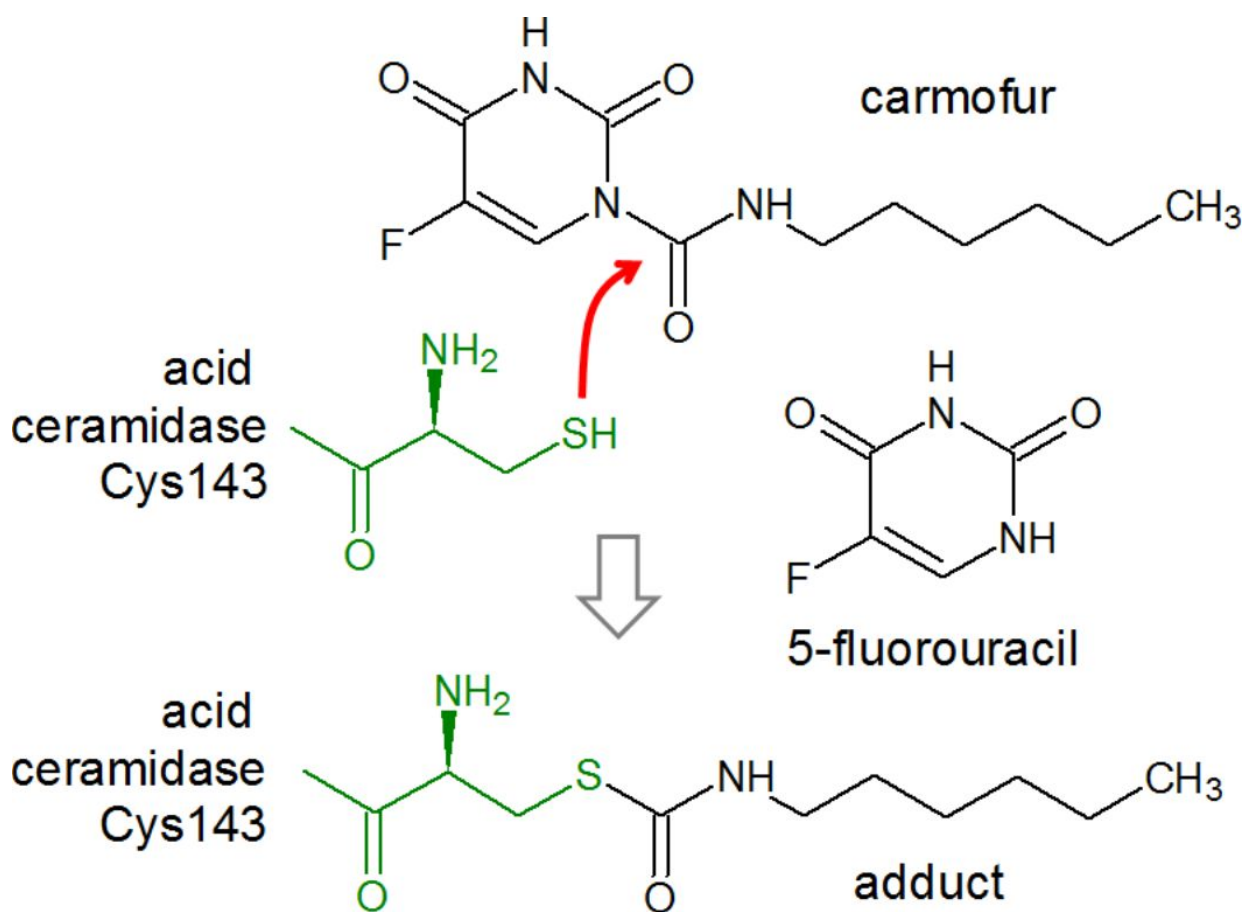

**Figure S1. Chemical structures of carmofur and its mechanism of inhibition.** (A) Chemical structures of carmofur and 5-fluorouracil are shown, demonstrating the electrophilic carbonyl group attacked by the nucleophilic Cys143 is labeled by the red arrow. The chemical composition of the product formed after the inhibitor cleavage is shown.
